# Supplementary material for: Insights into Emerging Begomovirus–Deltasatellite Complex Diversity: The First Deltasatellite Infecting Legumes
Source: MDPI journal article supplement (doi:10.3390/biology10111125), 2021-11-02
Supplement: s1 [file s1]

# **Insights into emerging begomovirus-deltasatellite complex diversity: the first deltasatellite infecting legumes**

**Elvira Fiallo-Olivé, Liseth Bastidas, Dorys T. Chirinos and Jesús Navas-Castillo**

## **Supplementary Materials**

**Figure S1.** Correlation analysis between the length of the iteron-like sequences and the Gibbs free energy (dG) of the predicted secondary stem-loops of New World deltasatellites.

**Table S1.** Cloning strategy to obtain the infectious dimer plasmids of cabbage leaf curl virus (CabLCV) DNA-A and DNA-B and cabbage leaf curl deltasatellite (CabLCD) genomes.

**Table S2.** Primers and PCR conditions employed to prepare the DNA probes used in this work.

**Table S3.** GenBank accession numbers of full-length begomovirus (DNA-A and DNA-B components) and deltasatellite genomes characterized in this work.

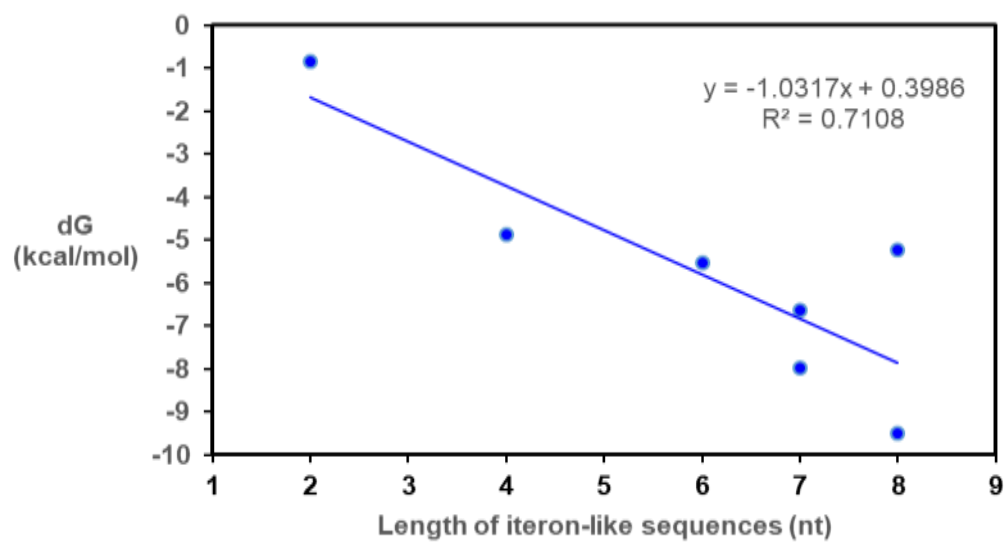

**Figure S1.** Correlation analysis between the length of the iteron-like sequences and the Gibbs free energy (dG) of the predicted secondary stem-loops of New World deltasatellites.

**Table S1.** Cloning strategy to obtain the infectious dimer plasmids of cabbage leaf curl virus (CabLCV) DNA-A and DNA-B and cabbage leaf curl deltasatellite (CabLCD) genomes.

| DNA component/sample | Monomer vector/enzyme <sup>1</sup> | Enzyme used to obtain the dimeric molecule after RCA | Vector/enzyme used to clone the dimer | Enzymes used to subclone the dimer in the binary vector pCAMBIA0380 | Infectious dimer plasmid |
|----------------------|------------------------------------|------------------------------------------------------|---------------------------------------|---------------------------------------------------------------------|--------------------------|
| CabLCV DNA-A/V9      | CabLCV DNA-A/SacI                  | SspI                                                 | pBSK(+)/EcoRV                         | EcoRI/SalI                                                          | pC0380dimCabLCV-A        |
| CabLCV DNA-B/V9      | CabLCV DNA-B/SacI                  | SacI                                                 | pUC18(+)/SacI                         | EcoRI/PstI                                                          | pC0380dimCabLCV-B        |
| CabLCD DNA/V9        | CabLCD DNA/EcoRI                   | EcoRI                                                | pBSK(+)/EcoRI                         | BamHI/HindIII                                                       | pC0380dimCabLCD          |

<sup>1</sup>Enzyme used to clone the virus/satellite monomers and also used for digestion of monomeric clone to carry out RCA.

**Table S2.** Primers and PCR conditions employed to prepare the DNA probes used in this work.

| Target virus/deltasatellite | Fragment size (bp) | Primers (5'-3' sequence)                                                 | PCR program                                                         |
|-----------------------------|--------------------|--------------------------------------------------------------------------|---------------------------------------------------------------------|
| CabLCV DNA-A                | 604                | MA2671 (CACCAAGTTGTGGGCCTATATAACG)<br>MA2672 (CGTCACCTTTGCGTAGAACTTGTG)  | 3 min 95°C<br>x34 (45 s 95°C, 45 s 62.7°C, 45 s 72°C)<br>5 min 72°C |
| CabLCV DNA-B                | 492                | MA2673 (GTTGCACGTAATCATGGTTCAAAGC)<br>MA2674 (CACACGCTTCAAAACATGGCGAAC)  | 3 min 95°C<br>x34 (45 s 95°C, 45 s 60.9°C, 45 s 72°C)<br>5 min 72°C |
| CabLCD                      | 340                | MA2675 (GTCTCATGATCAACTGTTTCATGAAG)<br>MA2676 (CTAAGGCTGTGCCTAGGGAAATAC) | 3 min 95°C<br>x34 (45 s 95°C, 45 s 59.7°C, 45 s 72°C)<br>5 min 72°C |

**Table S3.** GenBank accession numbers of full-length begomovirus (DNA-A and DNA-B components) and deltasatellite genomes characterized in this work.

| Virus/deltasatellite             | Sample | Genome component | GenBank accession number |
|----------------------------------|--------|------------------|--------------------------|
| Cabbage leaf curl virus          | V2     | DNA-A            | OK044468                 |
|                                  |        | DNA-B            | OK044469                 |
|                                  | V9     | DNA-A            | OK044478                 |
|                                  |        | DNA-B            | OK044479                 |
|                                  | V10    | DNA-A            | OK044480                 |
|                                  |        | DNA-B            | OK044481                 |
|                                  | V13    | DNA-A            | OK044484                 |
|                                  |        | DNA-B            | OK044485                 |
|                                  | V20    | DNA-A            | OK044486                 |
|                                  |        | DNA-B            | OK044487                 |
|                                  | V22    | DNA-A            | OK044490                 |
|                                  |        | DNA-B            | OK044491                 |
|                                  | V23    | DNA-A            | OK044492                 |
|                                  |        | DNA-B            | OK044493                 |
| Rhynchosia mottle virus          | V35    | DNA-A            | OK044494                 |
|                                  |        | DNA-B            | OK044495                 |
|                                  | V11    | DNA-A            | OK044482                 |
|                                  |        | DNA-B            | OK044483                 |
|                                  | V21    | DNA-A            | OK044488                 |
|                                  |        | DNA-B            | OK044489                 |
| Macroptilium mottle virus        | V3     | DNA-A            | OK044470                 |
|                                  |        | DNA-B            | OK044471                 |
| Bean leaf crumple virus          | V4     | DNA-A            | OK044472                 |
|                                  |        | DNA-B            | OK044473                 |
| Desmodium mosaic virus           | V6     | DNA-A            | OK044474                 |
|                                  |        | DNA-B            | OK044475                 |
| Desmodium yellow spot virus      | V7     | DNA-A            | OK044476                 |
|                                  |        | DNA-B            | OK044477                 |
| Cabbage leaf curl deltasatellite | V1     | DNA              | OK073969                 |
|                                  | V2     | DNA              | OK073970                 |
|                                  | V8     | DNA              | OK073971                 |
|                                  | V9     | DNA              | OK073972                 |
|                                  | V10    | DNA              | OK073973                 |
|                                  | V12    | DNA              | OK073974                 |
|                                  | V13    | DNA              | OK073975                 |
